# Supplementary material for: Patterns of mortality by occupation in the UK, 1991–2011: a comparative analysis of linked census and mortality records
Source: PubMed Central journal article supplement (PMC5666203; doi:10.1016/s2468-2667(17)30193-7), 2017-10-23
Supplement: mmc1.pdf [file mmc1.pdf]

# THE LANCET

## Public Health

### Supplementary appendix

This appendix formed part of the original submission and has been peer reviewed. We post it as supplied by the authors.

Supplement to: Katikireddi SV, Leyland AH, McKee M, Ralston K, Stuckler D. Patterns of mortality by occupation in the UK, 1991–2011: a comparative analysis of linked census and mortality records. *Lancet Public Health* 2017; published online Oct 23. [http://dx.doi.org/10.1016/S2468-2667\(17\)30193-7](http://dx.doi.org/10.1016/S2468-2667(17)30193-7).

## **Appendix Contents**

|                                                                                                                                            |    |
|--------------------------------------------------------------------------------------------------------------------------------------------|----|
| Appendix Table 1: Classification of Occupational (SOC) codes                                                                               | 2  |
| Appendix Table 2a: Mortality rates by occupation in Scotland in men                                                                        | 14 |
| Appendix Table 2b: Mortality rates by occupation in Scotland in women                                                                      | 16 |
| Appendix Table 3a: Mortality rates by occupation in Northern Ireland in men                                                                | 18 |
| Appendix Table 3b: Mortality rates by occupation in Northern Ireland in women                                                              | 19 |
| Appendix Table 4: Comparison of mortality rates by occupation between men and women in England/Wales for selected occupational groups      | 20 |
| Appendix Table 5a: Expected change in deaths in England/Wales among working age men if occupational mortality rates for Scotland applied   | 23 |
| Appendix Table 5b: Expected change in deaths in England/Wales among working age women if occupational mortality rates for Scotland applied | 26 |

**Appendix Table 1: Classification of Occupational (SOC) codes**

In order to adhere to disclosure control guidelines and ensure adequate statistical power, the classification of SOC codes was modified. The SOC coding system is hierarchical, with the most refined classification provided by four digit unit groups (371 categories). These are nested in 81 minor groups (defined by 3 digit codes) which lie within 25 sub-major groups (defined by two digit codes). At the top of the hierarchy are nine major groups, defined by a single digit code. In order to gain adequate statistical power, we used three digit SOC codes in general.

The below table indicates which SOC codes were used. For some specific categories, additional SOC codes were grouped together and are indicated by numbers in the table below. For example, SOC code 11 in males included SOC codes 111, 114 and 118, but SOC codes 112, 113, 115, 116 and 117 were coded separately.

| Major Group | Sub-Major Group | Minor Group | Unit Group | Group Title                                            | Men           | Women |
|-------------|-----------------|-------------|------------|--------------------------------------------------------|---------------|-------|
| <b>1</b>    |                 |             |            | <b>MANAGERS, DIRECTORS AND SENIOR OFFICIALS</b>        |               |       |
|             | <b>11</b>       |             |            | <b>CORPORATE MANAGERS AND DIRECTORS</b>                | 111, 114, 118 | X     |
|             |                 | <b>111</b>  |            | <b>Chief Executives and Senior Officials</b>           |               |       |
|             |                 |             | 1111       | Senior officials in national government                |               |       |
|             |                 |             | 1112       | Directors and chief executives of major organisations  |               |       |
|             |                 |             | 1113       | Senior officials in local government                   |               |       |
|             |                 |             | 1114       | Senior officials of special interest organisations     |               |       |
|             |                 | <b>112</b>  |            | <b>Production Managers</b>                             | X             |       |
|             |                 |             | 1121       | Production, works and maintenance managers             |               |       |
|             |                 |             | 1122       | Managers in construction                               |               |       |
|             |                 |             | 1123       | Managers in mining and energy                          |               |       |
|             |                 | <b>113</b>  |            | <b>Functional Managers</b>                             | X             |       |
|             |                 |             | 1131       | Financial managers and chartered secretaries           |               |       |
|             |                 |             | 1132       | Marketing and sales managers                           |               |       |
|             |                 |             | 1133       | Purchasing managers                                    |               |       |
|             |                 |             | 1134       | Advertising and public relations managers              |               |       |
|             |                 |             | 1135       | Personnel, training and industrial relations managers  |               |       |
|             |                 |             | 1136       | Information and communication technology managers      |               |       |
|             |                 |             | 1137       | Research and development managers                      |               |       |
|             |                 | <b>114</b>  |            | <b>Quality And Customer Care Managers</b>              |               |       |
|             |                 |             | 1141       | Quality assurance managers                             |               |       |
|             |                 |             | 1142       | Customer care managers                                 |               |       |
|             |                 | <b>115</b>  |            | <b>Financial Institution And Office Managers</b>       | X             |       |
|             |                 |             | 1151       | Financial institution managers                         |               |       |
|             |                 |             | 1152       | Office managers                                        |               |       |
|             |                 | <b>116</b>  |            | <b>Managers In Distribution, Storage And Retailing</b> | X             |       |
|             |                 |             | 1161       | Transport and distribution managers                    |               |       |
|             |                 |             | 1162       | Storage and warehouse managers                         |               |       |

|  |           |            |      |                                                                     |                |                |
|--|-----------|------------|------|---------------------------------------------------------------------|----------------|----------------|
|  |           |            | 1163 | Retail and wholesale managers                                       |                |                |
|  |           | <b>117</b> |      | <b>Protective Service Officers</b>                                  | X              |                |
|  |           |            | 1171 | Officers in armed forces                                            |                |                |
|  |           |            | 1172 | Police officers (inspectors and above)                              |                |                |
|  |           |            | 1173 | Senior officers in fire, ambulance, prison and related services     |                |                |
|  |           |            | 1174 | Security managers                                                   |                |                |
|  |           | <b>118</b> |      | <b>Health And Social Services Managers</b>                          |                |                |
|  |           |            | 1181 | Hospital and health service managers                                |                |                |
|  |           |            | 1182 | Pharmacy managers                                                   |                |                |
|  |           |            | 1183 | Healthcare practice managers                                        |                |                |
|  |           |            | 1184 | Social services managers                                            |                |                |
|  |           |            | 1185 | Residential and day care managers                                   |                |                |
|  | <b>12</b> |            |      | <b>MANAGERS AND PROPRIETORS IN AGRICULTURE AND SERVICES</b>         | <b>121+122</b> | <b>121+122</b> |
|  |           | <b>121</b> |      | <b>Managers In Farming, Horticulture, Forestry And Fishing</b>      |                |                |
|  |           |            | 1211 | Farm managers                                                       |                |                |
|  |           |            | 1212 | Natural environment and conservation managers                       |                |                |
|  |           |            | 1219 | Managers in animal husbandry, forestry and fishing n.e.c.           |                |                |
|  |           | <b>122</b> |      | <b>Managers And Proprietors In Hospitality And Leisure Services</b> |                |                |
|  |           |            | 1221 | Hotel and accommodation managers                                    |                |                |
|  |           |            | 1222 | Conference and exhibition managers                                  |                |                |
|  |           |            | 1223 | Restaurant and catering managers                                    |                |                |
|  |           |            | 1224 | Publicans and managers of licensed premises                         |                |                |
|  |           |            | 1225 | Leisure and sports managers                                         |                |                |
|  |           |            | 1226 | Travel agency managers                                              |                |                |
|  |           | <b>123</b> |      | <b>Managers And Proprietors In Other Service Industries</b>         | X              | X              |
|  |           |            | 1231 | Property, housing and land managers                                 |                |                |
|  |           |            | 1232 | Garage managers and proprietors                                     |                |                |
|  |           |            | 1233 | Hairdressing and beauty salon managers and proprietors              |                |                |
|  |           |            | 1234 | Shopkeepers and wholesale/retail dealers                            |                |                |
|  |           |            | 1235 | Recycling and refuse disposal managers                              |                |                |
|  |           |            | 1239 | Managers and proprietors in other services n.e.c.                   |                |                |
|  |           |            |      |                                                                     |                |                |
|  |           |            |      | <b>PROFESSIONAL OCCUPATIONS</b>                                     |                |                |
|  | <b>21</b> |            |      | <b>SCIENCE, RESEARCH, ENGINEERING AND TECHNOLOGY PROFESSIONALS</b>  |                | X              |
|  |           | <b>211</b> |      | <b>Natural and Social Science Professionals</b>                     | X              |                |
|  |           |            | 2111 | Chemists                                                            |                |                |
|  |           |            | 2112 | Biological scientists and biochemists                               |                |                |
|  |           |            | 2113 | Physicists, geologists and meteorologists                           |                |                |
|  |           | <b>212</b> |      | <b>Engineering Professionals</b>                                    | X              |                |

|  |    |            |      |                                                                    |   |   |
|--|----|------------|------|--------------------------------------------------------------------|---|---|
|  |    |            | 2121 | Civil engineers                                                    |   |   |
|  |    |            | 2122 | Mechanical engineers                                               |   |   |
|  |    |            | 2123 | Electrical engineers                                               |   |   |
|  |    |            | 2124 | Electronics engineers                                              |   |   |
|  |    |            | 2125 | Chemical engineers                                                 |   |   |
|  |    |            | 2126 | Design and development engineers                                   |   |   |
|  |    |            | 2127 | Production and process engineers                                   |   |   |
|  |    |            | 2128 | Planning and quality control engineers                             |   |   |
|  |    |            | 2129 | Engineering professionals n.e.c.                                   |   |   |
|  |    | <b>213</b> |      | <b>Information And Communication Technology Professionals</b>      | X |   |
|  |    |            | 2131 | IT strategy and planning professionals                             |   |   |
|  |    |            | 2132 | Software professionals                                             |   |   |
|  | 22 |            |      | <b>HEALTH PROFESSIONALS</b>                                        |   |   |
|  |    | <b>221</b> |      | <b>Health professionals</b>                                        | X | X |
|  |    |            | 2211 | Medical practitioners                                              |   |   |
|  |    |            | 2212 | Psychologists                                                      |   |   |
|  |    |            | 2213 | Pharmacists/pharmacologists                                        |   |   |
|  |    |            | 2214 | Ophthalmic opticians                                               |   |   |
|  |    |            | 2215 | Dental practitioners                                               |   |   |
|  |    |            | 2216 | Veterinarians                                                      |   |   |
|  | 23 |            |      | <b>TEACHING AND RESEARCH PROFESSIONALS</b>                         |   |   |
|  |    | <b>231</b> |      | <b>Teaching Professionals</b>                                      | X | X |
|  |    |            | 2311 | Higher education teaching professionals                            |   |   |
|  |    |            | 2312 | Further education teaching professionals                           |   |   |
|  |    |            | 2313 | Education officers, school inspectors                              |   |   |
|  |    |            | 2314 | Secondary education teaching professionals                         |   |   |
|  |    |            | 2315 | Primary and nursery education teaching professionals               |   |   |
|  |    |            | 2316 | Special needs education teaching professionals                     |   |   |
|  |    |            | 2317 | Registrars and senior administrators of educational establishments |   |   |
|  |    |            | 2319 | Teaching professionals n.e.c.                                      |   |   |
|  |    | <b>232</b> |      | <b>Research Professional</b>                                       | X | X |
|  |    |            | 2321 | Scientific researchers                                             |   |   |
|  |    |            | 2322 | Social science researchers                                         |   |   |
|  |    |            | 2329 | Researchers n.e.c.                                                 |   |   |
|  | 24 |            |      | <b>BUSINESS AND PUBLIC SERVICE PROFESSIONALS</b>                   | X | X |
|  |    | <b>241</b> |      | <b>Legal Professionals</b>                                         |   |   |
|  |    |            | 2411 | Solicitors and lawyers, judges and coroners                        |   |   |
|  |    |            | 2419 | Legal professionals n.e.c.                                         |   |   |
|  |    | <b>242</b> |      | <b>Business And Statistical Professionals</b>                      |   |   |
|  |    |            | 2421 | Chartered and certified accountants                                |   |   |
|  |    |            | 2422 | Management accountants                                             |   |   |
|  |    |            | 2423 | Management consultants, actuaries, economists and statisticians    |   |   |
|  |    | <b>243</b> |      | <b>Architects, Town Planners, Surveyors</b>                        |   |   |

|   |           |            |      |                                                           |   |   |
|---|-----------|------------|------|-----------------------------------------------------------|---|---|
|   |           |            | 2431 | Architects                                                |   |   |
|   |           |            | 2432 | Town planners                                             |   |   |
|   |           |            | 2433 | Quantity surveyors                                        |   |   |
|   |           |            | 2434 | Chartered surveyors (not quantity surveyors)              |   |   |
|   |           | <b>244</b> |      | <b>Public Service Professionals</b>                       |   |   |
|   |           |            | 2441 | Public service administrative professionals               |   |   |
|   |           |            | 2442 | Social workers                                            |   |   |
|   |           |            | 2443 | Probation officers                                        |   |   |
|   |           |            | 2444 | Clergy                                                    |   |   |
|   |           | <b>245</b> |      | <b>Librarians And Related Professionals</b>               |   |   |
|   |           |            | 2451 | Librarians                                                |   |   |
|   |           |            | 2452 | Archivists and curators                                   |   |   |
|   |           |            |      |                                                           |   |   |
| 3 |           |            |      | <b>ASSOCIATE PROFESSIONAL AND TECHNICAL OCCUPATIONS</b>   |   |   |
|   |           |            |      |                                                           |   |   |
|   | <b>31</b> |            |      | <b>SCIENCE AND TECHNOLOGY ASSOCIATE PROFESSIONALS</b>     |   | X |
|   |           | <b>311</b> |      | <b>Science And Engineering Technicians</b>                | X |   |
|   |           |            | 3111 | Laboratory technicians                                    |   |   |
|   |           |            | 3112 | Electrical/electronics technicians                        |   |   |
|   |           |            | 3113 | Engineering technicians                                   |   |   |
|   |           |            | 3114 | Building and civil engineering technicians                |   |   |
|   |           |            | 3115 | Quality assurance technicians                             |   |   |
|   |           |            | 3119 | Science and engineering technicians n.e.c.                |   |   |
|   |           | <b>312</b> |      | <b>Draughtspersons And Building Inspectors</b>            | X |   |
|   |           |            | 3121 | Architectural technologists and town planning technicians |   |   |
|   |           |            | 3122 | Draughtspersons                                           |   |   |
|   |           |            | 3123 | Building inspectors                                       |   |   |
|   |           | <b>313</b> |      | <b>IT Service Delivery Occupations</b>                    | X |   |
|   |           |            | 3131 | IT operations technicians                                 |   |   |
|   |           |            | 3132 | IT user support technicians                               |   |   |
|   | 32        |            |      | <b>HEALTH AND SOCIAL WELFARE ASSOCIATE PROFESSIONALS</b>  |   |   |
|   |           | <b>321</b> |      | <b>Health Associate Professionals</b>                     | X | X |
|   |           |            | 3211 | Nurses                                                    |   |   |
|   |           |            | 3212 | Midwives                                                  |   |   |
|   |           |            | 3213 | Paramedics                                                |   |   |
|   |           |            | 3214 | Medical radiographers                                     |   |   |
|   |           |            | 3215 | Chiropodists                                              |   |   |
|   |           |            | 3216 | Dispensing opticians                                      |   |   |
|   |           |            | 3217 | Pharmaceutical dispensers                                 |   |   |
|   |           |            | 3218 | Medical and dental technicians                            |   |   |
|   |           | <b>322</b> |      | <b>Therapists</b>                                         | X | X |
|   |           |            | 3221 | Physiotherapists                                          |   |   |
|   |           |            | 3222 | Occupational therapists                                   |   |   |
|   |           |            | 3223 | Speech and language therapists                            |   |   |

|  |    |            |      |                                                        |   |   |
|--|----|------------|------|--------------------------------------------------------|---|---|
|  |    |            | 3229 | Therapists n.e.c.                                      |   |   |
|  |    | <b>323</b> |      | <b>Social Welfare Associate Professionals</b>          | X | X |
|  |    |            | 3231 | Youth and community workers                            |   |   |
|  |    |            | 3232 | Housing and welfare officers                           |   |   |
|  | 33 |            |      | PROTECTIVE SERVICE OCCUPATIONS                         |   |   |
|  |    | <b>331</b> |      | <b>Protective Service Occupations</b>                  | X | X |
|  |    |            | 3311 | NCOs and other ranks                                   |   |   |
|  |    |            | 3312 | Police officers (sergeant and below)                   |   |   |
|  |    |            | 3313 | Fire service officers (leading fire officer and below) |   |   |
|  |    |            | 3314 | Prison service officers (below principal officer)      |   |   |
|  |    |            | 3319 | Protective service associate professionals n.e.c.      |   |   |
|  | 34 |            |      | CULTURE, MEDIA AND SPORTS OCCUPATIONS                  | X | X |
|  |    | <b>341</b> |      | <b>Artistic And Literary Occupations</b>               |   |   |
|  |    |            | 3411 | Artists                                                |   |   |
|  |    |            | 3412 | Authors, writers                                       |   |   |
|  |    |            | 3413 | Actors, entertainers                                   |   |   |
|  |    |            | 3414 | Dancers and choreographers                             |   |   |
|  |    |            | 3415 | Musicians                                              |   |   |
|  |    |            | 3416 | Arts officers, producers and directors                 |   |   |
|  |    | <b>342</b> |      | <b>Design Associate Professionals</b>                  |   |   |
|  |    |            | 3421 | Graphic designers                                      |   |   |
|  |    |            | 3422 | Product, clothing and related designers                |   |   |
|  |    | <b>343</b> |      | <b>Media Associate Professionals</b>                   |   |   |
|  |    |            | 3431 | Journalists, newspaper and periodical editors          |   |   |
|  |    |            | 3432 | Broadcasting associate professionals                   |   |   |
|  |    |            | 3433 | Public relations officers                              |   |   |
|  |    |            | 3434 | Photographers and audio-visual equipment operators     |   |   |
|  |    | <b>344</b> |      | <b>Sports And Fitness Occupations</b>                  |   |   |
|  |    |            | 3441 | Sports players                                         |   |   |
|  |    |            | 3442 | Sports coaches, instructors and officials              |   |   |
|  |    |            | 3443 | Fitness instructors                                    |   |   |
|  |    |            | 3449 | Sports and fitness occupations n.e.c.                  |   |   |
|  | 35 |            |      | BUSINESS AND PUBLIC SERVICE ASSOCIATE PROFESSIONALS    |   | X |
|  |    | <b>351</b> |      | <b>Transport Associate Professionals</b>               | X |   |
|  |    |            | 3511 | Air traffic controllers                                |   |   |
|  |    |            | 3512 | Aircraft pilots and flight engineers                   |   |   |
|  |    |            | 3513 | Ship and hovercraft officers                           |   |   |
|  |    |            | 3514 | Train drivers                                          |   |   |
|  |    | <b>352</b> |      | <b>Legal Associate Professionals</b>                   | X |   |
|  |    |            | 3520 | Legal associate professionals                          |   |   |
|  |    | <b>353</b> |      | <b>Business And Finance Associate Professionals</b>    | X |   |
|  |    |            | 3531 | Estimators, valuers and assessors                      |   |   |
|  |    |            | 3532 | Brokers                                                |   |   |
|  |    |            | 3533 | Insurance underwriters                                 |   |   |

|   |    |            |      |                                                                         |   |   |
|---|----|------------|------|-------------------------------------------------------------------------|---|---|
|   |    |            | 3534 | Finance and investment analysts/advisers                                |   |   |
|   |    |            | 3535 | Taxation experts                                                        |   |   |
|   |    |            | 3536 | Importers, exporters                                                    |   |   |
|   |    |            | 3537 | Financial and accounting technicians                                    |   |   |
|   |    |            | 3539 | Business and related associate professionals n.e.c.                     |   |   |
|   |    | <b>354</b> |      | <b>Sales And Related Associate Professionals</b>                        | X |   |
|   |    |            | 3541 | Buyers and purchasing officers                                          |   |   |
|   |    |            | 3542 | Sales representatives                                                   |   |   |
|   |    |            | 3543 | Marketing associate professionals                                       |   |   |
|   |    |            | 3544 | Estate agents, auctioneers                                              |   |   |
|   |    | <b>355</b> |      | <b>Conservation Associate Professionals</b>                             | X |   |
|   |    |            | 3551 | Conservation and environmental protection officers                      |   |   |
|   |    |            | 3552 | Countryside and park rangers                                            |   |   |
|   |    | <b>356</b> |      | <b>Public Service And Other Associate Professionals</b>                 | X |   |
|   |    |            | 3561 | Public service associate professionals                                  |   |   |
|   |    |            | 3562 | Personnel and industrial relations officers                             |   |   |
|   |    |            | 3563 | Vocational and industrial trainers and instructors                      |   |   |
|   |    |            | 3564 | Careers advisers and vocational guidance specialists                    |   |   |
|   |    |            | 3565 | Inspectors of factories, utilities and trading standards                |   |   |
|   |    |            | 3566 | Statutory examiners                                                     |   |   |
|   |    |            | 3567 | Occupational hygienists and safety officers (health and safety)         |   |   |
|   |    |            | 3568 | Environmental health officers                                           |   |   |
|   |    |            |      |                                                                         |   |   |
|   |    |            |      | ADMINISTRATIVE AND SECRETARIAL OCCUPATIONS                              |   |   |
| 4 |    |            |      |                                                                         |   |   |
|   | 41 |            |      | ADMINISTRATIVE OCCUPATIONS                                              |   |   |
|   |    | <b>411</b> |      | <b>Administrative Occupations: Government And Related Organisations</b> | X | X |
|   |    |            | 4111 | Civil Service executive officers                                        |   |   |
|   |    |            | 4112 | Civil Service administrative officers and assistants                    |   |   |
|   |    |            | 4113 | Local government clerical officers and assistants                       |   |   |
|   |    |            | 4114 | Officers of non-governmental organisations                              |   |   |
|   |    | <b>412</b> |      | <b>Administrative Occupations: Finance</b>                              | X | X |
|   |    |            | 4121 | Credit controllers                                                      |   |   |
|   |    |            | 4122 | Accounts and wages clerks, book-keepers, other financial clerks         |   |   |
|   |    |            | 4123 | Counter clerks                                                          |   |   |
|   |    | <b>413</b> |      | <b>Administrative Occupations: Records</b>                              | X | X |
|   |    |            | 4131 | Filing and other records assistants/clerks                              |   |   |
|   |    |            | 4132 | Pensions and insurance clerks                                           |   |   |
|   |    |            | 4133 | Stock control clerks                                                    |   |   |
|   |    |            | 4134 | Transport and distribution clerks                                       |   |   |



|   |    |            |      |                                                              |   |   |
|---|----|------------|------|--------------------------------------------------------------|---|---|
|   |    |            | 4135 | Library assistants/clerks                                    |   |   |
|   |    |            | 4136 | Database assistants/clerks                                   |   |   |
|   |    |            | 4137 | Market research interviewers                                 |   |   |
|   |    | <b>414</b> |      | <b>Administrative Occupations: Communications</b>            | X | X |
|   |    |            | 4141 | Telephonists                                                 |   |   |
|   |    |            | 4142 | Communication operators                                      |   |   |
|   |    | <b>415</b> |      | <b>Administrative Occupations: General</b>                   | X | X |
|   |    |            | 4150 | General office assistants/clerks                             |   |   |
|   | 42 |            |      | SECRETARIAL AND RELATED OCCUPATIONS                          |   |   |
|   |    | <b>421</b> |      | <b>Secretarial And Related Occupations</b>                   | X | X |
|   |    |            | 4211 | Medical secretaries                                          |   |   |
|   |    |            | 4212 | Legal secretaries                                            |   |   |
|   |    |            | 4213 | School secretaries                                           |   |   |
|   |    |            | 4214 | Company secretaries                                          |   |   |
|   |    |            | 4215 | Personal assistants and other secretaries                    |   |   |
|   |    |            | 4216 | Receptionists                                                |   |   |
|   |    |            | 4217 | Typists                                                      |   |   |
|   |    |            |      |                                                              |   |   |
| 5 |    |            |      | SKILLED TRADES OCCUPATIONS                                   |   |   |
|   |    |            |      |                                                              |   |   |
|   | 51 |            |      | SKILLED AGRICULTURAL TRADES                                  |   |   |
|   |    | <b>511</b> |      | <b>Agricultural Trades</b>                                   | X | X |
|   |    |            | 5111 | Farmers                                                      |   |   |
|   |    |            | 5112 | Horticultural trades                                         |   |   |
|   |    |            | 5113 | Gardeners and groundsman/groundswomen                        |   |   |
|   |    |            | 5119 | Agricultural and fishing trades n.e.c.                       |   |   |
|   | 52 |            |      | SKILLED METAL AND ELECTRICAL TRADES                          |   | X |
|   |    | <b>521</b> |      | <b>Metal Forming, Welding And Related Trades</b>             | X |   |
|   |    |            | 5211 | Smiths and forge workers                                     |   |   |
|   |    |            | 5212 | Moulders, core makers, die casters                           |   |   |
|   |    |            | 5213 | Sheet metal workers                                          |   |   |
|   |    |            | 5214 | Metal plate workers, shipwrights, riveters                   |   |   |
|   |    |            | 5215 | Welding trades                                               |   |   |
|   |    |            | 5216 | Pipe fitters                                                 |   |   |
|   |    | <b>522</b> |      | <b>Metal Machining, Fitting And Instrument Making Trades</b> | X |   |
|   |    |            | 5221 | Metal machining setters and setter-operators                 |   |   |
|   |    |            | 5222 | Tool makers, tool fitters and markers-out                    |   |   |
|   |    |            | 5223 | Metal working production and maintenance fitters             |   |   |
|   |    |            | 5224 | Precision instrument makers and repairers                    |   |   |
|   |    | <b>523</b> |      | <b>Vehicle Trades</b>                                        | X |   |
|   |    |            | 5231 | Motor mechanics, auto engineers                              |   |   |
|   |    |            | 5232 | Vehicle body builders and repairers                          |   |   |
|   |    |            | 5233 | Auto electricians                                            |   |   |
|   |    |            | 5234 | Vehicle spray painters                                       |   |   |
|   |    | <b>524</b> |      | <b>Electrical Trades</b>                                     | X |   |

|  |    |     |      |                                                     |   |   |
|--|----|-----|------|-----------------------------------------------------|---|---|
|  |    |     | 5241 | Electricians, electrical fitters                    |   |   |
|  |    |     | 5242 | Telecommunications engineers                        |   |   |
|  |    |     | 5243 | Lines repairers and cable jointers                  |   |   |
|  |    |     | 5244 | TV, video and audio engineers                       |   |   |
|  |    |     | 5245 | Computer engineers, installation and maintenance    |   |   |
|  |    |     | 5249 | Electrical/electronics engineers n.e.c.             |   |   |
|  | 53 |     |      | SKILLED CONSTRUCTION AND BUILDING TRADES            |   | X |
|  |    | 531 |      | <b>Construction Trades</b>                          | X |   |
|  |    |     | 5311 | Steel erectors                                      |   |   |
|  |    |     | 5312 | Bricklayers, masons                                 |   |   |
|  |    |     | 5313 | Roofers, roof tilers and slaters                    |   |   |
|  |    |     | 5314 | Plumbers, heating and ventilating engineers         |   |   |
|  |    |     | 5315 | Carpenters and joiners                              |   |   |
|  |    |     | 5316 | Glaziers, window fabricators and fitters            |   |   |
|  |    |     | 5319 | Construction trades n.e.c.                          |   |   |
|  |    | 532 |      | <b>Building Trades</b>                              | X |   |
|  |    |     | 5321 | Plasterers                                          |   |   |
|  |    |     | 5322 | Floorers and wall tilers                            |   |   |
|  |    |     | 5323 | Painters and decorators                             |   |   |
|  | 54 |     |      | TEXTILES, PRINTING AND OTHER SKILLED TRADES         |   |   |
|  |    | 541 |      | <b>Textiles And Garments Trades</b>                 | X | X |
|  |    |     | 5411 | Weavers and knitters                                |   |   |
|  |    |     | 5412 | Upholsterers                                        |   |   |
|  |    |     | 5413 | Leather and related trades                          |   |   |
|  |    |     | 5414 | Tailors and dressmakers                             |   |   |
|  |    |     | 5419 | Textiles, garments and related trades n.e.c.        |   |   |
|  |    | 542 |      | <b>Printing Trades</b>                              | X | X |
|  |    |     | 5421 | Originators, compositors and print preparers        |   |   |
|  |    |     | 5422 | Printers                                            |   |   |
|  |    |     | 5423 | Bookbinders and print finishers                     |   |   |
|  |    |     | 5424 | Screen printers                                     |   |   |
|  |    | 543 |      | <b>Food Preparation Trades</b>                      | X | X |
|  |    |     | 5431 | Butchers, meat cutters                              |   |   |
|  |    |     | 5432 | Bakers, flour confectioners                         |   |   |
|  |    |     | 5433 | Fishmongers, poultry dressers                       |   |   |
|  |    |     | 5434 | Chefs, cooks                                        |   |   |
|  |    | 549 |      | <b>Skilled Trades n. e. c.</b>                      | X | X |
|  |    |     | 5491 | Glass and ceramics makers, decorators and finishers |   |   |
|  |    |     | 5492 | Furniture makers, other craft woodworkers           |   |   |
|  |    |     | 5493 | Pattern makers (moulds)                             |   |   |
|  |    |     | 5494 | Musical instrument makers and tuners                |   |   |
|  |    |     | 5495 | Goldsmiths, silversmiths, precious stone workers    |   |   |
|  |    |     | 5496 | Floral arrangers, florists                          |   |   |
|  |    |     | 5499 | Hand craft occupations n.e.c.                       |   |   |

|   |    |            |      |                                                 |   |   |
|---|----|------------|------|-------------------------------------------------|---|---|
| 6 |    |            |      | PERSONAL SERVICE OCCUPATIONS                    |   |   |
|   | 61 |            |      | CARING PERSONAL SERVICE OCCUPATIONS             |   |   |
|   |    | <b>611</b> |      | <b>Healthcare And Related Personal Services</b> | X | X |
|   |    |            | 6111 | Nursing auxiliaries and assistants              |   |   |
|   |    |            | 6112 | Ambulance staff (excluding paramedics)          |   |   |
|   |    |            | 6113 | Dental nurses                                   |   |   |
|   |    |            | 6114 | Houseparents and residential wardens            |   |   |
|   |    |            | 6115 | Care assistants and home carers                 |   |   |
|   |    | <b>612</b> |      | <b>Childcare And Related Personal Services</b>  | X | X |
|   |    |            | 6121 | Nursery nurses                                  |   |   |
|   |    |            | 6122 | Childminders and related occupations            |   |   |
|   |    |            | 6123 | Playgroup leaders/assistants                    |   |   |
|   |    |            | 6124 | Educational assistants                          |   |   |
|   |    | <b>613</b> |      | <b>Animal Care Services</b>                     | X | X |
|   |    |            | 6131 | Veterinary nurses and assistants                |   |   |
|   |    |            | 6139 | Animal care occupations n.e.c.                  |   |   |
|   | 62 |            |      | LEISURE AND OTHER PERSONAL SERVICE OCCUPATIONS  |   |   |
|   |    | <b>621</b> |      | <b>Leisure And Travel Service Occupations</b>   | X | X |
|   |    |            | 6211 | Sports and leisure assistants                   |   |   |
|   |    |            | 6212 | Travel agents                                   |   |   |
|   |    |            | 6213 | Travel and tour guides                          |   |   |
|   |    |            | 6214 | Air travel assistants                           |   |   |
|   |    |            | 6215 | Rail travel assistants                          |   |   |
|   |    |            | 6219 | Leisure and travel service occupations n.e.c.   |   |   |
|   |    | <b>622</b> |      | <b>Hairdressers And Related Occupations</b>     | X | X |
|   |    |            | 6221 | Hairdressers, barbers                           |   |   |
|   |    |            | 6222 | Beauticians and related occupations             |   |   |
|   |    | <b>623</b> |      | <b>Housekeeping Occupations</b>                 | X | X |
|   |    |            | 6231 | Housekeepers and related occupations            |   |   |
|   |    |            | 6232 | Caretakers                                      |   |   |
|   |    | <b>629</b> |      | <b>Personal Services Occupations n. e. c.</b>   | X | X |
|   |    |            | 6291 | Undertakers and mortuary assistants             |   |   |
|   |    |            | 6292 | Pest control officers                           |   |   |
| 7 |    |            |      | SALES AND CUSTOMER SERVICE OCCUPATIONS          |   |   |
|   | 71 |            |      | SALES OCCUPATIONS                               |   |   |
|   |    | <b>711</b> |      | <b>Sales Assistants And Retail Cashiers</b>     | X | X |
|   |    |            | 7111 | Sales and retail assistants                     |   |   |
|   |    |            | 7112 | Retail cashiers and check-out operators         |   |   |
|   |    |            | 7113 | Telephone salespersons                          |   |   |
|   |    | <b>712</b> |      | <b>Sales Related Occupations</b>                | X | X |
|   |    |            | 7121 | Collector salespersons and credit agents        |   |   |
|   |    |            | 7122 | Debt, rent and other cash collectors            |   |   |

|   |    |            |      |                                                     |   |   |
|---|----|------------|------|-----------------------------------------------------|---|---|
|   |    |            | 7123 | Roundsmen/women and van salespersons                |   |   |
|   |    |            | 7124 | Market and street traders and assistants            |   |   |
|   |    |            | 7125 | Merchandisers and window dressers                   |   |   |
|   |    |            | 7129 | Sales related occupations n.e.c.                    |   |   |
|   | 72 |            |      | CUSTOMER SERVICE OCCUPATIONS                        |   |   |
|   |    | <b>721</b> |      | <b>Customer Service Occupations</b>                 | X | X |
|   |    |            | 7211 | Call centre agents/operators                        |   |   |
|   |    |            | 7212 | Customer care occupations                           |   |   |
|   |    |            |      |                                                     |   |   |
| 8 |    |            |      | PROCESS, PLANT AND MACHINE OPERATIVES               |   |   |
|   |    |            |      |                                                     |   |   |
|   | 81 |            |      | PROCESS, PLANT AND MACHINE OPERATIVES               |   |   |
|   |    | <b>811</b> |      | <b>Process Operatives</b>                           | X | X |
|   |    |            | 8111 | Food, drink and tobacco process operatives          |   |   |
|   |    |            | 8112 | Glass and ceramics process operatives               |   |   |
|   |    |            | 8113 | Textile process operatives                          |   |   |
|   |    |            | 8114 | Chemical and related process operatives             |   |   |
|   |    |            | 8115 | Rubber process operatives                           |   |   |
|   |    |            | 8116 | Plastics process operatives                         |   |   |
|   |    |            | 8117 | Metal making and treating process operatives        |   |   |
|   |    |            | 8118 | Electroplaters                                      |   |   |
|   |    |            | 8119 | Process operatives n.e.c.                           |   |   |
|   |    | <b>812</b> |      | <b>Plant And Machine Operatives</b>                 | X | X |
|   |    |            | 8121 | Paper and wood machine operatives                   |   |   |
|   |    |            | 8122 | Coal mine operatives                                |   |   |
|   |    |            | 8123 | Quarry workers and related operatives               |   |   |
|   |    |            | 8124 | Energy plant operatives                             |   |   |
|   |    |            | 8125 | Metal working machine operatives                    |   |   |
|   |    |            | 8126 | Water and sewerage plant operatives                 |   |   |
|   |    |            | 8129 | Plant and machine operatives n.e.c.                 |   |   |
|   |    | <b>813</b> |      | <b>Assemblers And Routine Operatives</b>            | X | X |
|   |    |            | 8131 | Assemblers (electrical products)                    |   |   |
|   |    |            | 8132 | Assemblers (vehicles and metal goods)               |   |   |
|   |    |            | 8133 | Routine inspectors and testers                      |   |   |
|   |    |            | 8134 | Weighers, graders, sorters                          |   |   |
|   |    |            | 8135 | Tyre, exhaust and windscreen fitters                |   |   |
|   |    |            | 8136 | Clothing cutters                                    |   |   |
|   |    |            | 8137 | Sewing machinists                                   |   |   |
|   |    |            | 8138 | Routine laboratory testers                          |   |   |
|   |    |            | 8139 | Assemblers and routine operatives n.e.c.            |   |   |
|   |    | <b>814</b> |      | <b>Construction Operatives</b>                      | X | X |
|   |    |            | 8141 | Scaffolders, staggers, riggers                      |   |   |
|   |    |            | 8142 | Road construction operatives                        |   |   |
|   |    |            | 8143 | Rail construction and maintenance operatives        |   |   |
|   |    |            | 8149 | Construction operatives n.e.c.                      |   |   |
|   | 82 |            |      | TRANSPORT AND MOBILE MACHINE DRIVERS AND OPERATIVES |   |   |

|    |    |            |      |                                                               |   |   |
|----|----|------------|------|---------------------------------------------------------------|---|---|
|    |    | <b>821</b> |      | <b>Transport Drivers And Operatives</b>                       | X | X |
|    |    |            | 8211 | Heavy goods vehicle drivers                                   |   |   |
|    |    |            | 8212 | Van drivers                                                   |   |   |
|    |    |            | 8213 | Bus and coach drivers                                         |   |   |
|    |    |            | 8214 | Taxi, cab drivers and chauffeurs                              |   |   |
|    |    |            | 8215 | Driving instructors                                           |   |   |
|    |    |            | 8216 | Rail transport operatives                                     |   |   |
|    |    |            | 8217 | Seafarers (merchant navy); barge, lighter and boat operatives |   |   |
|    |    |            | 8218 | Air transport operatives                                      |   |   |
|    |    |            | 8219 | Transport operatives n.e.c.                                   |   |   |
|    |    | <b>822</b> |      | <b>Mobile Machine Drivers And Operatives</b>                  | X | X |
|    |    |            | 8221 | Crane drivers                                                 |   |   |
|    |    |            | 8222 | Fork-lift truck drivers                                       |   |   |
|    |    |            | 8223 | Agricultural machinery drivers                                |   |   |
|    |    |            | 8229 | Mobile machine drivers and operatives n.e.c.                  |   |   |
| 9  |    |            |      | ELEMENTARY OCCUPATIONS                                        |   |   |
|    | 91 |            |      | ELEMENTARY TRADES, PLANT AND STORAGE RELATED OCCUPATIONS      |   |   |
|    |    | <b>911</b> |      | <b>Elementary Agricultural Occupations</b>                    | X | X |
|    |    |            | 9111 | Farm workers                                                  |   |   |
|    |    |            | 9112 | Forestry workers                                              |   |   |
|    |    |            | 9119 | Fishing and agriculture related occupations n.e.c.            |   |   |
|    |    | <b>912</b> |      | <b>Elementary Construction Occupations</b>                    | X | X |
|    |    |            | 9121 | Labourers in building and woodworking trades                  |   |   |
|    |    |            | 9129 | Labourers in other construction trades n.e.c.                 |   |   |
|    |    | <b>913</b> |      | <b>Elementary Process Plant Occupations</b>                   | X | X |
|    |    |            | 9131 | Labourers in foundries                                        |   |   |
|    |    |            | 9132 | Industrial cleaning process occupations                       |   |   |
|    |    |            | 9133 | Printing machine minders and assistants                       |   |   |
|    |    |            | 9134 | Packers, bottlers, canners, fillers                           |   |   |
|    |    |            | 9139 | Labourers in process and plant operations n.e.c.              |   |   |
|    |    | <b>914</b> |      | <b>Elementary Goods Storage Occupations</b>                   | X | X |
|    |    |            | 9141 | Stevedores, dockers and slingers                              |   |   |
|    |    |            | 9149 | Other goods handling and storage occupations n.e.c.           |   |   |
| 92 |    |            |      | ELEMENTARY ADMINISTRATION AND SERVICE OCCUPATIONS             |   |   |
|    |    | <b>921</b> |      | <b>Elementary Administration Occupations</b>                  | X | X |
|    |    |            | 9211 | Postal workers, mail sorters, messengers, couriers            |   |   |
|    |    |            | 9219 | Elementary office occupations n.e.c.                          |   |   |
|    |    | <b>922</b> |      | <b>Elementary Personal Services Occupations</b>               | X | X |
|    |    |            | 9221 | Hospital porters                                              |   |   |
|    |    |            | 9222 | Hotel porters                                                 |   |   |
|    |    |            | 9223 | Kitchen and catering assistants                               |   |   |

|  |  |            |      |                                                 |   |   |
|--|--|------------|------|-------------------------------------------------|---|---|
|  |  |            | 9224 | Waiters, waitresses                             |   |   |
|  |  |            | 9225 | Bar staff                                       |   |   |
|  |  |            | 9226 | Leisure and theme park attendants               |   |   |
|  |  |            | 9229 | Elementary personal services occupations n.e.c. |   |   |
|  |  | <b>923</b> |      | <b>Elementary Cleaning Occupations</b>          | X | X |
|  |  |            | 9231 | Window cleaners                                 |   |   |
|  |  |            | 9232 | Road sweepers                                   |   |   |
|  |  |            | 9233 | Cleaners, domestics                             |   |   |
|  |  |            | 9234 | Launderers, dry cleaners, pressers              |   |   |
|  |  |            | 9235 | Refuse and salvage occupations                  |   |   |
|  |  |            | 9239 | Elementary cleaning occupations n.e.c.          |   |   |
|  |  | <b>924</b> |      | <b>Elementary Security Occupations</b>          | X | X |
|  |  |            | 9241 | Security guards and related occupations         |   |   |
|  |  |            | 9242 | Traffic wardens                                 |   |   |
|  |  |            | 9243 | School crossing patrol attendants               |   |   |
|  |  |            | 9244 | School mid-day assistants                       |   |   |
|  |  |            | 9245 | Car park attendants                             |   |   |
|  |  |            | 9249 | Elementary security occupations n.e.c.          |   |   |
|  |  | <b>925</b> |      | <b>Elementary Sales Occupations</b>             | X | X |
|  |  |            | 9251 | Shelf fillers                                   |   |   |
|  |  |            | 9259 | Elementary sales occupations n.e.c.             |   |   |

**Appendix Table 2a: Mortality rates by occupation in Scotland in men**

| Employment group                                                 | SOC code* | Person-Years | EASR | Low 95% CI | High 95% CI | Rank |
|------------------------------------------------------------------|-----------|--------------|------|------------|-------------|------|
| Corporate managers and directors                                 | 11        | 5312         | 244  | 117        | 372         | 9    |
| Production Managers                                              | 112       | 20347        | 243  | 182        | 305         | 8    |
| Functional Managers                                              | 113       | 21323        | 261  | 172        | 351         | 11   |
| Financial Institution And Office Managers                        | 115       | 6876         | 321  | 191        | 451         | 15   |
| Managers In Distribution, Storage And Retailing                  | 116       | 13312        | 363  | 252        | 474         | 23   |
| Protective Service Officers                                      | 117       | 2858         | 436  | 165        | 707         | 30   |
| Managers and proprietors in agriculture and services             | 12        | 10763        | 353  | 242        | 464         | 22   |
| Managers And Proprietors In Other Service Industries             | 123       | 15127        | 333  | 241        | 426         | 18   |
| Engineering Professionals                                        | 212       | 14990        | 333  | 234        | 432         | 17   |
| Information And Communication Technology Professionals           | 213       | 10171        | 214  | 81         | 347         | 2    |
| Health professionals                                             | 221       | 6685         | 145  | 50         | 240         | 1    |
| Teaching Professionals                                           | 231       | 16617        | 219  | 158        | 281         | 4    |
| Research Professional                                            | 232       | 2740         | 328  | 26         | 630         | 16   |
| Business and public service professionals                        | 24        | 18640        | 218  | 149        | 287         | 3    |
| Science And Engineering Technicians                              | 311       | 13016        | 314  | 206        | 422         | 14   |
| Draughtspersons And Building Inspectors                          | 312       | 3318         | 494  | 212        | 777         | 38   |
| IT Service Delivery Occupations                                  | 313       | 4575         | 224  | 0          | 456         | 5    |
| Health Associate Professionals                                   | 321       | 4593         | 438  | 220        | 657         | 31   |
| Social Welfare Associate Professionals                           | 323       | 3278         | 372  | 141        | 603         | 24   |
| Protective Service Occupations                                   | 331       | 17173        | 386  | 255        | 517         | 26   |
| Culture, media and sports occupations                            | 34        | 10630        | 307  | 187        | 427         | 13   |
| Transport Associate Professionals                                | 351       | 3690         | 339  | 136        | 543         | 19   |
| Business And Finance Associate Professionals                     | 353       | 9666         | 229  | 125        | 333         | 6    |
| Sales And Related Associate Professionals                        | 354       | 10799        | 235  | 140        | 329         | 7    |
| Public Service And Other Associate Professionals                 | 356       | 7539         | 379  | 242        | 517         | 25   |
| Administrative Occupations: Government And Related Organisations | 411       | 6005         | 521  | 343        | 699         | 45   |
| Administrative Occupations: Finance                              | 412       | 8347         | 303  | 161        | 446         | 12   |
| Administrative Occupations: Records                              | 413       | 10452        | 346  | 220        | 472         | 20   |
| Administrative Occupations: Communications                       | 414       | 1241         | 724  | 39         | 1410        | 56   |
| Administrative Occupations: General                              | 415       | 6396         | 430  | 242        | 618         | 27   |
| Secretarial And Related Occupations                              | 421       |              |      |            |             |      |
| Agricultural Trades                                              | 511       | 18949        | 447  | 350        | 544         | 33   |
| Metal Forming, Welding And Related Trades                        | 521       | 9910         | 507  | 370        | 643         | 41   |
| Metal Machining, Fitting And Instrument Making Trades            | 522       | 21221        | 431  | 344        | 518         | 28   |
| Vehicle Trades                                                   | 523       | 10771        | 351  | 231        | 471         | 21   |
| Electrical Trades                                                | 524       | 22986        | 462  | 371        | 552         | 35   |
| Construction Trades                                              | 531       | 35967        | 501  | 425        | 577         | 39   |
| Building Trades                                                  | 532       | 11551        | 513  | 380        | 646         | 43   |
| Textiles And Garments Trades                                     | 541       |              |      |            |             |      |
| Printing Trades                                                  | 542       | 2804         | 638  | 315        | 962         | 53   |
| Food Preparation Trades                                          | 543       | 12822        | 485  | 351        | 619         | 37   |
| Skilled Trades n. e. c.                                          | 549       | 3415         | 461  | 219        | 703         | 34   |
| Healthcare And Related Personal Services                         | 611       | 6333         | 434  | 266        | 603         | 29   |
| Animal Care Services                                             | 613       | 479          | 1125 | 127        | 2123        | 61   |
| Leisure And Travel Service Occupations                           | 621       | 3368         | 721  | 377        | 1065        | 54   |
| Hairdressers And Related Occupations                             | 622       |              |      |            |             |      |
| Housekeeping Occupations                                         | 623       | 3591         | 568  | 318        | 818         | 48   |
| Sales Assistants And Retail Cashiers                             | 711       | 14228        | 444  | 283        | 605         | 32   |
| Sales Related Occupations                                        | 712       | 4458         | 509  | 303        | 715         | 42   |
| Customer Service Occupations                                     | 721       | 5608         | 247  | 49         | 444         | 10   |
| Process Operatives                                               | 811       | 13674        | 476  | 359        | 592         | 36   |
| Plant And Machine Operatives                                     | 812       | 16897        | 521  | 410        | 631         | 44   |
| Assemblers And Routine Operatives                                | 813       | 13354        | 630  | 475        | 785         | 52   |
| Construction Operatives                                          | 814       | 10330        | 623  | 472        | 774         | 51   |

|                                          |     |        |      |      |      |    |
|------------------------------------------|-----|--------|------|------|------|----|
| Transport Drivers And Operatives         | 821 | 42023  | 503  | 440  | 566  | 40 |
| Mobile Machine Drivers And Operatives    | 822 | 9897   | 559  | 410  | 708  | 47 |
| Elementary Agricultural Occupations      | 911 | 7130   | 572  | 390  | 754  | 49 |
| Elementary Construction Occupations      | 912 | 13061  | 937  | 771  | 1103 | 60 |
| Elementary Process Plant Occupations     | 913 | 13085  | 829  | 666  | 992  | 59 |
| Elementary Goods Storage Occupations     | 914 | 16057  | 619  | 486  | 752  | 50 |
| Elementary Administration Occupations    | 921 | 9548   | 545  | 390  | 700  | 46 |
| Elementary Personal Services Occupations | 922 | 11572  | 724  | 520  | 927  | 55 |
| Elementary Cleaning Occupations          | 923 | 10567  | 770  | 605  | 934  | 58 |
| Elementary Security Occupations          | 924 | 7543   | 740  | 560  | 919  | 57 |
| Elementary Sales Occupations             | 925 |        |      |      |      |    |
| No occupation reported                   |     | 52255  | 1242 | 1131 | 1352 |    |
| All those reporting an occupation§       |     | 680710 | 437  | 421  | 454  |    |

EASR = European age-standardised mortality rates per 100,000 person-years

\*Standard Occupational Classification (SOC) codes have been modified for disclosure control purposes. See Appendix Table 1 for details.

§Note that this includes not only SOC categories listed, but also small occupational groups that have been suppressed for disclosure control (equating to a total of 1.5% of all person-years). Therefore, person-years for the SOC codes listed do not total to the last two rows.

Source: Scottish Longitudinal Study



**Appendix Table 2b: Mortality rates by occupation in Scotland in women**

| Employment group                                                 | SOC code* | Person-Years | EASR | Low 95% CI | High 95% CI | Rank |
|------------------------------------------------------------------|-----------|--------------|------|------------|-------------|------|
| Corporate managers and directors                                 | 11        | 39799        | 178  | 131        | 225         | 5    |
| Managers and proprietors in agriculture and services             | 12        | 11323        | 236  | 147        | 325         | 18   |
| Managers And Proprietors In Other Service Industries             | 123       | 9257         | 243  | 148        | 338         | 21   |
| Science, research, engineering and technology professionals      | 21        | 6091         | 429  | 24         | 833         | 37   |
| Health professionals                                             | 221       | 6144         | 215  | 63         | 366         | 11   |
| Teaching Professionals                                           | 231       | 38283        | 160  | 122        | 197         | 4    |
| Research Professional                                            | 232       |              |      |            |             |      |
| Business and public service professionals                        | 24        | 12492        | 201  | 109        | 292         | 8    |
| Science and technology associate professionals                   | 31        | 7445         | 220  | 100        | 341         | 12   |
| Health Associate Professionals                                   | 321       | 34289        | 241  | 186        | 296         | 20   |
| Therapists                                                       | 322       | 4924         | 148  | 28         | 269         | 2    |
| Social Welfare Associate Professionals                           | 323       | 10220        | 202  | 110        | 295         | 9    |
| Protective Service Occupations                                   | 331       | 2481         | 570  | 42         | 1097        | 42   |
| Culture, media and sports occupations                            | 34        | 8413         | 203  | 83         | 323         | 10   |
| Business and public service associate professionals              | 35        | 28254        | 200  | 131        | 269         | 7    |
| Administrative Occupations: Government And Related Organisations | 411       | 13429        | 238  | 154        | 321         | 19   |
| Administrative Occupations: Finance                              | 412       | 30513        | 249  | 190        | 308         | 22   |
| Administrative Occupations: Records                              | 413       | 17717        | 222  | 147        | 297         | 13   |
| Administrative Occupations: Communications                       | 414       | 4428         | 273  | 118        | 428         | 25   |
| Administrative Occupations: General                              | 415       | 39050        | 226  | 177        | 276         | 15   |
| Secretarial And Related Occupations                              | 421       | 42318        | 223  | 180        | 266         | 14   |
| Agricultural Trades                                              | 511       | 2138         | 118  | 15         | 221         | 1    |
| Skilled metal and electrical trades                              | 52        | 1786         | 387  | 80         | 694         | 34   |
| Skilled construction and building trades                         | 53        |              |      |            |             |      |
| Textiles And Garments Trades                                     | 541       | 1931         | 478  | 200        | 756         | 39   |
| Printing Trades                                                  | 542       | 1446         | 330  | 38         | 622         | 28   |
| Food Preparation Trades                                          | 543       | 11025        | 422  | 299        | 546         | 35   |
| Skilled Trades n. e. c.                                          | 549       |              |      |            |             |      |
| Healthcare And Related Personal Services                         | 611       | 46928        | 284  | 237        | 330         | 26   |
| Childcare And Related Personal Services                          | 612       | 22117        | 232  | 156        | 309         | 17   |
| Leisure And Travel Service Occupations                           | 621       | 6846         | 228  | 99         | 357         | 16   |
| Hairdressers And Related Occupations                             | 622       | 9776         | 356  | 185        | 526         | 33   |
| Housekeeping Occupations                                         | 623       | 5033         | 254  | 129        | 380         | 23   |
| Sales Assistants And Retail Cashiers                             | 711       | 71571        | 308  | 264        | 351         | 27   |
| Sales Related Occupations                                        | 712       | 4023         | 186  | 46         | 325         | 6    |
| Customer Service Occupations                                     | 721       | 14348        | 158  | 83         | 233         | 3    |
| Process Operatives                                               | 811       | 9176         | 338  | 218        | 457         | 29   |
| Plant And Machine Operatives                                     | 812       | 2135         | 663  | 320        | 1006        | 43   |
| Assemblers And Routine Operatives                                | 813       | 21991        | 494  | 399        | 588         | 40   |
| Transport Drivers And Operatives                                 | 821       | 2587         | 257  | 52         | 462         | 24   |
| Elementary Agricultural Occupations                              | 911       |              |      |            |             |      |
| Elementary Process Plant Occupations                             | 913       | 11075        | 467  | 338        | 595         | 38   |
| Elementary Goods Storage Occupations                             | 914       | 2256         | 528  | 189        | 867         | 41   |
| Elementary Administration Occupations                            | 921       | 5060         | 354  | 180        | 528         | 32   |
| Elementary Personal Services Occupations                         | 922       | 35905        | 346  | 276        | 415         | 31   |
| Elementary Cleaning Occupations                                  | 923       | 44486        | 426  | 371        | 481         | 36   |
| Elementary Security Occupations                                  | 924       | 3801         | 339  | 178        | 500         | 30   |
| Elementary Sales Occupations                                     | 925       |              |      |            |             |      |
| No occupation reported                                           |           | 64710        | 695  | 628        | 762         |      |
| All those reporting an occupation§                               |           | 716950       | 277  | 264        | 290         |      |

EASR = European age-standardised mortality rates per 100,000 person-years

\*Standard Occupational Classification (SOC) codes have been modified for disclosure control purposes. See Appendix Table 1 for details.

§Note that this includes not only SOC categories listed, but also small occupational groups that have been suppressed for disclosure control (equating to a total of 1.6% of all person-years). Therefore, person-years for the SOC codes listed do not total to the last two rows.

Source: Scottish Longitudinal Study

**Appendix Table 3a: Mortality rates by occupation in Northern Ireland in men**

| <b>Employment group</b>                                          | <b>SOC code*</b> | <b>Person-Years</b> | <b>EASR</b> | <b>Low 95% CI</b> | <b>High 95% CI</b> | <b>Rank</b> |
|------------------------------------------------------------------|------------------|---------------------|-------------|-------------------|--------------------|-------------|
| Corporate managers and directors                                 | 11               | 380331              | 233         | 217               | 249                | 6           |
| Managers and proprietors in agriculture and services             | 12               | 55930               | 349         | 298               | 400                | 25          |
| Managers And Proprietors In Other Service Industries             | 123              | 89047               | 258         | 227               | 288                | 9           |
| Natural and Social Science Professionals                         | 211              | 11302               | 318         | 216               | 420                | 14          |
| Engineering Professionals                                        | 212              | 64710               | 200         | 159               | 240                | 3           |
| Information And Communication Technology Professionals           | 213              | 47305               | 243         | 140               | 346                | 7           |
| Health professionals                                             | 221              | 40230               | 137         | 98                | 176                | 1           |
| Teaching Professionals                                           | 231              | 126477              | 203         | 181               | 225                | 4           |
| Research Professional                                            | 232              | 14439               | 258         | 156               | 359                | 8           |
| Business and public service professionals                        | 24               | 107453              | 182         | 155               | 208                | 2           |
| Associate professional and technical occupations                 | 3                | 514830              | 285         | 268               | 302                | 10          |
| Administrative Occupations: Government And Related Organisations | 411              | 110582              | 338         | 305               | 372                | 19          |
| Administrative Occupations: Finance                              | 412              | 58421               | 339         | 285               | 393                | 20          |
| Administrative Occupations: Records                              | 413              | 44727               | 315         | 254               | 376                | 13          |
| Administrative Occupations: Communications                       | 414              | 5381                | 398         | 214               | 583                | 35          |
| Administrative Occupations: General                              | 415              | 93181               | 346         | 299               | 392                | 24          |
| Secretarial And Related Occupations                              | 421              | 8339                | 222         | 115               | 328                | 5           |
| Agricultural Trades                                              | 511              | 174085              | 287         | 263               | 311                | 11          |
| Metal Forming, Welding And Related Trades                        | 521              | 62668               | 418         | 361               | 476                | 41          |
| Metal Machining, Fitting And Instrument Making Trades            | 522              | 128242              | 349         | 315               | 383                | 26          |
| Vehicle Trades                                                   | 523              | 70657               | 334         | 284               | 384                | 17          |
| Electrical Trades                                                | 524              | 140711              | 318         | 286               | 351                | 15          |
| Construction Trades                                              | 531              | 300939              | 341         | 317               | 365                | 22          |
| Building Trades                                                  | 532              | 103712              | 407         | 365               | 449                | 38          |
| Textiles And Garments Trades                                     | 541              | 10779               | 337         | 225               | 449                | 18          |
| Printing Trades                                                  | 542              | 11865               | 351         | 228               | 473                | 27          |
| Food Preparation Trades                                          | 543              | 81829               | 418         | 360               | 476                | 40          |
| Skilled Trades n. e. c.                                          | 549              | 30695               | 380         | 295               | 465                | 34          |
| Healthcare And Related Personal Services                         | 611              | 32005               | 407         | 328               | 486                | 37          |
| Childcare And Related Personal Services                          | 612              | 3058                | 471         | 159               | 784                | 47          |
| Animal Care Services                                             | 613              | 2704                | 614         | 292               | 936                | 51          |
| Leisure And Travel Service Occupations                           | 621              | 11486               | 427         | 275               | 580                | 42          |
| Hairdressers And Related Occupations                             | 622              | 6260                | 322         | 136               | 507                | 16          |
| Housekeeping Occupations                                         | 623              | 22329               | 359         | 292               | 426                | 30          |
| Sales Assistants And Retail Cashiers                             | 711              | 101906              | 351         | 297               | 404                | 28          |
| Sales Related Occupations                                        | 712              | 27734               | 302         | 239               | 366                | 12          |
| Customer Service Occupations                                     | 721              | 14179               | 412         | 235               | 589                | 39          |
| Process Operatives                                               | 811              | 136199              | 405         | 367               | 443                | 36          |
| Plant And Machine Operatives                                     | 812              | 109011              | 339         | 301               | 378                | 21          |
| Assemblers And Routine Operatives                                | 813              | 71774               | 370         | 314               | 426                | 31          |
| Construction Operatives                                          | 814              | 63498               | 353         | 307               | 400                | 29          |
| Transport Drivers And Operatives                                 | 821              | 282078              | 373         | 351               | 395                | 32          |
| Mobile Machine Drivers And Operatives                            | 822              | 64764               | 438         | 386               | 489                | 43          |
| Elementary Agricultural Occupations                              | 911              | 41969               | 449         | 379               | 519                | 45          |
| Elementary Construction Occupations                              | 912              | 122572              | 522         | 481               | 562                | 49          |
| Elementary Process Plant Occupations                             | 913              | 90871               | 539         | 486               | 593                | 50          |
| Elementary Goods Storage Occupations                             | 914              | 100886              | 439         | 393               | 484                | 44          |

|                                          |     |       |     |     |     |    |
|------------------------------------------|-----|-------|-----|-----|-----|----|
| Elementary Administration Occupations    | 921 | 52375 | 344 | 286 | 402 | 23 |
| Elementary Personal Services Occupations | 922 | 66949 | 639 | 563 | 714 | 52 |
| Elementary Cleaning Occupations          | 923 | 55962 | 468 | 410 | 526 | 46 |
| Elementary Security Occupations          | 924 | 54217 | 505 | 449 | 560 | 48 |
| Elementary Sales Occupations             | 925 | 9258  | 374 | 170 | 577 | 33 |

EASR = European age-standardised mortality rates per 100,000 person-years

\*Standard Occupational Classification (SOC) codes have been modified for disclosure control purposes. See Appendix Table 1 for details.

Source: Northern Ireland Mortality Study

**Appendix Table 3b: Mortality rates by occupation in Northern Ireland in women**

| Employment group                                                 | SOC code* | Person-Years | EASR | Low 95% CI | High 95% CI | Rank |
|------------------------------------------------------------------|-----------|--------------|------|------------|-------------|------|
| Corporate managers and directors                                 | 11        | 212609       | 166  | 146        | 187         | 7    |
| Managers and proprietors in agriculture and services             | 12        | 50035        | 230  | 184        | 276         | 23   |
| Managers And Proprietors In Other Service Industries             | 123       | 50206        | 211  | 172        | 249         | 16   |
| Science, research, engineering and technology professionals      | 21        | 29248        | 155  | 82         | 227         | 5    |
| Health professionals                                             | 221       | 33077        | 95   | 45         | 144         | 1    |
| Teaching Professionals                                           | 231       | 271711       | 134  | 120        | 147         | 2    |
| Research Professional                                            | 232       | 13904        | 205  | 85         | 326         | 15   |
| Business and public service professionals                        | 24        | 68042        | 145  | 108        | 181         | 3    |
| Associate professionals and technical occupations                | 3         | 533249       | 177  | 164        | 190         | 9    |
| Administrative Occupations: Government And Related Organisations | 411       | 117934       | 198  | 170        | 225         | 14   |
| Administrative Occupations: Finance                              | 412       | 193982       | 196  | 173        | 219         | 13   |
| Administrative Occupations: Records                              | 413       | 87098        | 173  | 141        | 205         | 8    |
| Administrative Occupations: Communications                       | 414       | 22074        | 286  | 215        | 356         | 34   |
| Administrative Occupations: General                              | 415       | 270682       | 223  | 202        | 243         | 18   |
| Secretarial And Related Occupations                              | 421       | 274263       | 186  | 169        | 204         | 11   |
| Agricultural Trades                                              | 511       | 14029        | 239  | 161        | 318         | 26   |
| Skilled metal and electrical trades                              | 52        | 14197        | 303  | 210        | 396         | 37   |
| Skilled construction and building trades                         | 53        | 6231         | 279  | 149        | 408         | 33   |
| Textiles And Garments Trades                                     | 541       | 13885        | 331  | 249        | 413         | 40   |
| Printing Trades                                                  | 542       | 6202         | 181  | 74         | 288         | 10   |
| Food Preparation Trades                                          | 543       | 93290        | 250  | 216        | 283         | 27   |
| Skilled Trades n. e. c.                                          | 549       | 7858         | 337  | 194        | 479         | 41   |
| Healthcare And Related Personal Services                         | 611       | 269033       | 227  | 209        | 246         | 21   |
| Childcare And Related Personal Services                          | 612       | 145457       | 158  | 134        | 183         | 6    |
| Leisure And Travel Service Occupations                           | 621       | 26611        | 220  | 146        | 294         | 17   |
| Hairdressers And Related Occupations                             | 622       | 77852        | 230  | 180        | 279         | 24   |
| Housekeeping Occupations                                         | 623       | 28147        | 256  | 203        | 309         | 29   |
| Sales Assistants And Retail Cashiers                             | 711       | 473183       | 234  | 218        | 250         | 25   |
| Sales Related Occupations                                        | 712       | 15244        | 154  | 86         | 222         | 4    |
| Customer Service Occupations                                     | 721       | 36599        | 227  | 133        | 320         | 19   |
| Process Operatives                                               | 811       | 124130       | 319  | 288        | 350         | 38   |
| Plant And Machine Operatives                                     | 812       | 32976        | 293  | 227        | 359         | 36   |
| Assemblers And Routine Operatives                                | 813       | 192729       | 324  | 298        | 350         | 39   |
| Transport Drivers And Operatives                                 | 821       | 11733        | 291  | 177        | 404         | 35   |
| Elementary Agricultural Occupations                              | 911       | 8532         | 193  | 97         | 289         | 12   |
| Elementary Process Plant Occupations                             | 913       | 79215        | 339  | 299        | 380         | 42   |
| Elementary Goods Storage Occupations                             | 914       | 12120        | 227  | 130        | 324         | 20   |
| Elementary Administration Occupations                            | 921       | 28668        | 276  | 209        | 344         | 31   |
| Elementary Personal Services Occupations                         | 922       | 194105       | 268  | 243        | 292         | 30   |
| Elementary Cleaning Occupations                                  | 923       | 253449       | 277  | 258        | 295         | 32   |
| Elementary Security Occupations                                  | 924       | 36509        | 254  | 206        | 301         | 28   |
| Elementary Sales Occupations                                     | 925       | 17610        | 228  | 139        | 317         | 22   |

EASR = European age-standardised mortality rates per 100,000 person-years

\*Standard Occupational Classification (SOC) codes have been modified for disclosure control purposes. See Appendix Table 1 for details.

Source: Northern Ireland Mortality Study

**Appendix Table 4: Comparison of mortality rates by occupation between men and women in England/Wales for selected occupational groups**

| Employment group                                                 | SOC code* | Males        |      |            |             |      | Females      |      |            |             |      |
|------------------------------------------------------------------|-----------|--------------|------|------------|-------------|------|--------------|------|------------|-------------|------|
|                                                                  |           | Person-Years | EASR | Low 95% CI | High 95% CI | Rank | Person-Years | EASR | Low 95% CI | High 95% CI | Rank |
| MANAGERS AND PROPRIETORS IN AGRICULTURE AND SERVICES*            | 12        | 23348        | 450  | 364        | 536         | 24   | 23892        | 397  | 318        | 476         | 34   |
| Managers And Proprietors In Other Service Industries             | 123       | 36544        | 333  | 278        | 387         | 5    | 23180        | 227  | 162        | 291         | 11   |
| Health professionals                                             | 221       | 12873        | 225  | 145        | 304         | 1    | 10099        | 213  | 107        | 318         | 5    |
| Teaching Professionals                                           | 231       | 36736        | 262  | 210        | 313         | 3    | 79871        | 180  | 152        | 208         | 3    |
| BUSINESS AND PUBLIC SERVICE PROFESSIONALS                        | 24        | 41276        | 228  | 182        | 274         | 2    | 25728        | 159  | 104        | 214         | 2    |
| Health Associate Professionals                                   | 321       | 9248         | 288  | 171        | 404         | 4    | 58260        | 230  | 191        | 270         | 13   |
| Social Welfare Associate Professionals                           | 323       | 5084         | 334  | 166        | 501         | 6    | 13795        | 236  | 153        | 318         | 15   |
| CULTURE, MEDIA AND SPORTS OCCUPATIONS                            | 34        | 32202        | 350  | 273        | 428         | 10   | 26903        | 133  | 78         | 188         | 1    |
| Administrative Occupations: Government And Related Organisations | 411       | 11250        | 373  | 268        | 479         | 12   | 21080        | 263  | 192        | 334         | 18   |
| Administrative Occupations: Finance                              | 412       | 23118        | 347  | 265        | 429         | 8    | 72532        | 264  | 223        | 305         | 19   |
| Administrative Occupations: Records                              | 413       | 20129        | 418  | 318        | 517         | 19   | 37807        | 333  | 271        | 394         | 27   |
| Administrative Occupations: Communications                       | 414       | 2204         | 604  | 246        | 962         | 35   | 6727         | 368  | 233        | 502         | 30   |
| Administrative Occupations: General                              | 415       | 16102        | 461  | 342        | 581         | 25   | 76601        | 233  | 198        | 268         | 14   |
| Secretarial And Related Occupations                              | 421       | 4784         | 348  | 187        | 510         | 9    | 112533       | 218  | 192        | 244         | 7    |
| Agricultural Trades                                              | 511       | 23913        | 402  | 325        | 479         | 16   | 4776         | 251  | 114        | 389         | 16   |
| Textiles And Garments Trades                                     | 541       | 3809         | 569  | 330        | 808         | 33   | 3810         | 483  | 266        | 700         | 36   |
| Printing Trades                                                  | 542       | 7140         | 403  | 244        | 562         | 17   | 3557         | 256  | 104        | 409         | 17   |
| Food Preparation Trades                                          | 543       | 23061        | 439  | 335        | 542         | 22   | 18319        | 217  | 153        | 281         | 6    |
| Skilled Trades n. e. c.                                          | 549       | 9553         | 391  | 259        | 524         | 15   | 4170         | 380  | 175        | 585         | 31   |
| Healthcare And Related Personal Services                         | 611       | 11400        | 413  | 287        | 539         | 18   | 88120        | 290  | 255        | 325         | 22   |
| Leisure And Travel Service Occupations                           | 621       | 6145         | 345  | 165        | 524         | 7    | 12344        | 222  | 116        | 328         | 10   |
| Hairdressers And Related Occupations                             | 622       | 2755         | 492  | 226        | 759         | 26   | 21910        | 209  | 142        | 277         | 4    |
| Housekeeping Occupations                                         | 623       | 5202         | 567  | 402        | 732         | 32   | 8417         | 306  | 204        | 407         | 25   |
| Sales Assistants And Retail Cashiers                             | 711       | 33239        | 429  | 331        | 526         | 21   | 137985       | 305  | 275        | 336         | 24   |

|                                          |     |         |      |      |      |    |         |     |     |     |    |
|------------------------------------------|-----|---------|------|------|------|----|---------|-----|-----|-----|----|
| Sales Related Occupations                | 712 | 9552    | 368  | 251  | 485  | 11 | 9852    | 265 | 156 | 375 | 20 |
| Customer Service Occupations             | 721 | 8397    | 385  | 198  | 573  | 13 | 25489   | 230 | 153 | 307 | 12 |
| Process Operatives                       | 811 | 30195   | 529  | 445  | 614  | 28 | 17107   | 346 | 259 | 433 | 28 |
| Plant And Machine Operatives             | 812 | 38091   | 423  | 360  | 487  | 20 | 8707    | 517 | 370 | 663 | 37 |
| Assemblers And Routine Operatives        | 813 | 25176   | 501  | 410  | 593  | 27 | 34561   | 386 | 324 | 448 | 33 |
| Transport Drivers And Operatives         | 821 | 82677   | 445  | 401  | 489  | 23 | 6560    | 279 | 132 | 426 | 21 |
| Elementary Process Plant Occupations     | 913 | 32513   | 672  | 576  | 767  | 37 | 30212   | 405 | 334 | 476 | 35 |
| Elementary Goods Storage Occupations     | 914 | 37887   | 539  | 459  | 619  | 29 | 7984    | 220 | 104 | 336 | 9  |
| Elementary Administration Occupations    | 921 | 22354   | 389  | 305  | 473  | 14 | 12940   | 383 | 275 | 492 | 32 |
| Elementary Personal Services Occupations | 922 | 21359   | 650  | 510  | 790  | 36 | 59492   | 314 | 265 | 363 | 26 |
| Elementary Cleaning Occupations          | 923 | 20096   | 592  | 487  | 696  | 34 | 65159   | 352 | 311 | 394 | 29 |
| Elementary Security Occupations          | 924 | 15272   | 544  | 433  | 655  | 30 | 16424   | 301 | 222 | 380 | 23 |
| Elementary Sales Occupations             | 925 | 3571    | 556  | 209  | 903  | 31 | 6775    | 218 | 93  | 344 | 8  |
| No occupation reported                   |     | 39614   | 1189 | 1014 | 1364 |    | 83370   | 587 | 523 | 651 |    |
| All those reporting an occupation*       |     | 1457772 | 384  | 374  | 394  |    | 1485036 | 263 | 255 | 272 |    |

EASR = European age-standardised mortality rates per 100,000 person-years

\*Standard Occupational Classification (SOC) codes have been modified for disclosure control purposes. See Appendix Table 1 for details.

Source: ONS Longitudinal Study



**Appendix Table 5a: Expected change in deaths in England/Wales among working age men if mortality rates by occupation for Scotland applied §**

| <b>Employment group</b>                                          | <b>SOC code*</b> | <b>Difference between England and Scotland</b> | <b>95% CI</b> | <b>p value</b> | <b>Expected change in deaths in England</b> | <b>95% CI</b> |
|------------------------------------------------------------------|------------------|------------------------------------------------|---------------|----------------|---------------------------------------------|---------------|
| Corporate managers and directors                                 | 11               | 6                                              | -142, 155     | 0.936          | -8.7                                        | -220, 203     |
| Production Managers                                              | 112              | 21                                             | -57, 97       | 0.595          | -119                                        | -552, 325     |
| Functional Managers                                              | 113              | -28                                            | -125, 71      | 0.567          | 176                                         | -443, 781     |
| Financial Institution And Office Managers                        | 115              | -86                                            | -235, 58      | 0.245          | 188                                         | -126, 512     |
| Managers In Distribution, Storage And Retailing                  | 116              | -87                                            | -207, 34      | 0.154          | 397                                         | -154, 944     |
| Protective Service Officers                                      | 117              | -111                                           | -410, 183     | 0.478          | 72.2                                        | -119, 267     |
| Managers and proprietors in agriculture and services             | 12               | 97                                             | -42, 238      | 0.169          | -231                                        | -566, 101     |
| Managers And Proprietors In Other Service Industries             | 123              | -1.2                                           | -110, 105     | 0.986          | 4.5                                         | -393, 410     |
| Engineering Professionals                                        | 212              | -51                                            | -165, 62      | 0.38           | 187                                         | -226, 601     |
| Information And Communication Technology Professionals           | 213              | 52                                             | -104, 209     | 0.51           | -169                                        | -671, 334     |
| Health professionals                                             | 221              | 79                                             | -45, 202      | 0.21           | -104                                        | -266, 60      |
| Teaching Professionals                                           | 231              | 43                                             | -36, 124      | 0.293          | -161                                        | -464, 134     |
| Business and public service professionals                        | 24               | 10                                             | -72, 92       | 0.815          | -43                                         | -387, 302     |
| Science And Engineering Technicians                              | 311              | -43                                            | -171, 88      | 0.513          | 103                                         | -208, 405     |
| Draughtspersons And Building Inspectors                          | 312              | -213                                           | -536, 105     | 0.19           | 109                                         | -54, 274      |
| IT Service Delivery Occupations                                  | 313              | 127                                            | -165, 430     | 0.41           | -138                                        | -464, 178     |
| Health Associate Professionals                                   | 321              | -148                                           | -400, 99      | 0.236          | 140                                         | -93, 378      |
| Social Welfare Associate Professionals                           | 323              | -37                                            | -327, 251     | 0.798          | 19                                          | -130, 170     |
| Protective Service Occupations                                   | 331              | -123                                           | -276, 30      | 0.114          | 361                                         | -87, 813      |
| Culture, media and sports occupations                            | 34               | 43                                             | -101, 186     | 0.555          | -141                                        | -612, 333     |
| Transport Associate Professionals                                | 351              | -49                                            | -324, 229     | 0.708          | 25                                          | -119, 168     |
| Business And Finance Associate Professionals                     | 353              | 39                                             | -86, 164      | 0.537          | -104                                        | -435, 228     |
| Sales And Related Associate Professionals                        | 354              | 126                                            | 4.7, 250      | 0.043          | -347                                        | -687, -13     |
| Public Service And Other Associate Professionals                 | 356              | -70                                            | -236, 95      | 0.413          | 97                                          | -133, 330     |
| Administrative Occupations: Government And Related Organisations | 411              | -148                                           | -358, 61      | 0.156          | 171                                         | -70, 412      |
| Administrative Occupations: Finance                              | 412              | 44                                             | -120, 210     | 0.609          | -103                                        | -496, 284     |

|                                                       |     |      |           |       |      |            |
|-------------------------------------------------------|-----|------|-----------|-------|------|------------|
| Administrative Occupations: Records                   | 413 | 71   | -90, 231  | 0.39  | -145 | -476, 185  |
| Administrative Occupations: Communications            | 414 | -123 | -888, 655 | 0.756 | 28   | -147, 200  |
| Administrative Occupations: General                   | 415 | 30   | -189, 254 | 0.796 | -49  | -418, 311  |
| Agricultural Trades                                   | 511 | -45  | -167, 78  | 0.479 | 110  | -190, 408  |
| Metal Forming, Welding And Related Trades             | 521 | 55   | -124, 233 | 0.555 | -92  | -392, 208  |
| Metal Machining, Fitting And Instrument Making Trades | 522 | -31  | -135, 75  | 0.56  | 136  | -328, 591  |
| Vehicle Trades                                        | 523 | 106  | -47, 258  | 0.18  | -249 | -608, 111  |
| Electrical Trades                                     | 524 | -128 | -235, -21 | 0.019 | 547  | 91, 1005   |
| Construction Trades                                   | 531 | -83  | -171, 8.1 | 0.073 | 603  | -59, 1252  |
| Building Trades                                       | 532 | -67  | -224, 93  | 0.407 | 160  | -221, 533  |
| Printing Trades                                       | 542 | -238 | -605, 126 | 0.188 | 173  | -92, 441   |
| Food Preparation Trades                               | 543 | -48  | -213, 121 | 0.587 | 113  | -284, 501  |
| Skilled Trades n. e. c.                               | 549 | -73  | -349, 201 | 0.611 | 71   | -196, 341  |
| Healthcare And Related Personal Services              | 611 | -20  | -233, 190 | 0.858 | 23   | -221, 271  |
| Leisure And Travel Service Occupations                | 621 | -377 | -761, 11  | 0.059 | 237  | -6.9, 478  |
| Housekeeping Occupations                              | 623 | -1   | -302, 299 | 0.996 | 0.5  | -159, 160  |
| Sales Assistants And Retail Cashiers                  | 711 | -16  | -205, 174 | 0.869 | 53   | -589, 696  |
| Sales Related Occupations                             | 712 | -140 | -379, 97  | 0.245 | 137  | -94, 369   |
| Customer Service Occupations                          | 721 | 138  | -138, 409 | 0.327 | -118 | -351, 118  |
| Process Operatives                                    | 811 | 53   | -88, 196  | 0.478 | -163 | -605, 270  |
| Plant And Machine Operatives                          | 812 | -98  | -224, 31  | 0.139 | 380  | -119, 873  |
| Assemblers And Routine Operatives                     | 813 | -128 | -310, 55  | 0.161 | 329  | -142, 797  |
| Construction Operatives                               | 814 | -117 | -302, 66  | 0.207 | 195  | -110, 500  |
| Transport Drivers And Operatives                      | 821 | -58  | -136, 18  | 0.132 | 492  | -148, 1146 |
| Mobile Machine Drivers And Operatives                 | 822 | -3.1 | -197, 184 | 0.982 | 4.6  | -276, 295  |
| Elementary Agricultural Occupations                   | 911 | 50   | -208, 309 | 0.708 | -42  | -255, 172  |
| Elementary Construction Occupations                   | 912 | -235 | -433, -37 | 0.022 | 552  | 86, 1016   |
| Elementary Process Plant Occupations                  | 913 | -157 | -345, 33  | 0.107 | 520  | -109, 1145 |
| Elementary Goods Storage Occupations                  | 914 | -80  | -235, 70  | 0.308 | 311  | -271, 909  |
| Elementary Administration Occupations                 | 921 | -154 | -330, 21  | 0.088 | 352  | -49, 753   |
| Elementary Personal Services Occupations              | 922 | -73  | -323, 175 | 0.565 | 159  | -381, 704  |

|                                 |     |      |           |       |      |            |
|---------------------------------|-----|------|-----------|-------|------|------------|
| Elementary Cleaning Occupations | 923 | -179 | -376, 17  | 0.072 | 368  | -35, 771   |
| Elementary Security Occupations | 924 | -196 | -407, 13  | 0.07  | 306  | -20, 634   |
| No occupation reported          |     | -51  | -262, 154 | 0.634 | 206  | -623, 1060 |
| TOTAL                           |     |      |           |       | 6086 | 3008, 9175 |

\*Standard Occupational Classification (SOC) codes have been modified for disclosure control purposes. See Appendix Table 1 for details.

§ To assess differences between Scotland and England, Monte Carlo simulation was used to estimate the difference between the rate in Scotland and England. 95% CI and p values were calculated using this method as well. Simulated 95% CI are indicated using brackets.

Source: ONS Longitudinal Study and Scottish Longitudinal Study

**Appendix Table 5b: Expected change in deaths in England among working age women if mortality rates by occupation for Scotland applied §**

| <b>Employment group</b>                                          | <b>SOC code*</b> | <b>Difference between England and Scotland</b> | <b>95% CI</b> | <b>p value</b> | <b>Expected change in deaths in England</b> | <b>95% CI</b> |
|------------------------------------------------------------------|------------------|------------------------------------------------|---------------|----------------|---------------------------------------------|---------------|
| Corporate managers and directors                                 | 11               | 30                                             | -26, 87       | 0.29           | -319                                        | -911, 269     |
| Managers and proprietors in agriculture and services             | 12               | 160                                            | 41, 276       | 0.01           | -378                                        | -653, -98     |
| Managers And Proprietors In Other Service Industries             | 123              | -16                                            | -132, 98      | 0.77           | 38                                          | -225, 303     |
| Science, research, engineering and technology professionals      | 21               | -252                                           | -670, 159     | 0.23           | 335                                         | -211, 890     |
| Health professionals                                             | 221              | -1                                             | -191, 185     | 0.99           | 1                                           | -185, 191     |
| Teaching Professionals                                           | 231              | 20                                             | -27, 67       | 0.39           | -161                                        | -530, 212     |
| Business and public service professionals                        | 24               | -42                                            | -150, 64      | 0.45           | 108                                         | -162, 382     |
| Science and technology associate professionals                   | 31               | -17                                            | -155, 124     | 0.80           | 27                                          | -193, 242     |
| Health Associate Professionals                                   | 321              | -11                                            | -80, 57       | 0.76           | 60                                          | -331, 459     |
| Social Welfare Associate Professionals                           | 323              | 34                                             | -92, 160      | 0.60           | -46                                         | -218, 125     |
| Culture, media and sports occupations                            | 34               | -69                                            | -200, 62      | 0.31           | 183                                         | -165, 532     |
| Business and public service associate professionals              | 35               | -11                                            | -93, 67       | 0.79           | 73                                          | -427, 592     |
| Administrative Occupations: Government And Related Organisations | 411              | 25                                             | -85, 132      | 0.66           | -52                                         | -275, 177     |
| Administrative Occupations: Finance                              | 412              | 15                                             | -56, 87       | 0.69           | -106                                        | -625, 398     |
| Administrative Occupations: Records                              | 413              | 111                                            | 13, 207       | 0.03           | -416                                        | -775, -47     |
| Administrative Occupations: Communications                       | 414              | 92                                             | -115, 294     | 0.38           | -61                                         | -195, 76      |
| Administrative Occupations: General                              | 415              | 6                                              | -56, 69       | 0.86           | -46                                         | -519, 426     |
| Secretarial And Related Occupations                              | 421              | -6                                             | -57, 45       | 0.82           | 64                                          | -504, 632     |
| Agricultural Trades                                              | 511              | 134                                            | -39, 302      | 0.13           | -63                                         | -143, 18      |
| Skilled metal and electrical trades                              | 52               | -19                                            | -379, 336     | 0.91           | 9                                           | -158, 178     |
| Textiles And Garments Trades                                     | 541              | 8                                              | -340, 361     | 0.97           | -3                                          | -136, 128     |
| Printing Trades                                                  | 542              | -73                                            | -397, 251     | 0.67           | 26                                          | -88, 140      |
| Food preparation trades                                          | 543              | -205                                           | -344, -67     | 0.004          | 371                                         | 122, 623      |
| Healthcare And Related Personal Services                         | 611              | 7                                              | -51, 66       | 0.82           | -58                                         | -574, 448     |
| Childcare And Related Personal Services                          | 612              | -29                                            | -120, 60      | 0.54           | 158                                         | -333, 660     |
| Leisure And Travel Service Occupations                           | 621              | -6                                             | -173, 167     | 0.95           | 7                                           | -204, 211     |
| Hairdressers And Related Occupations                             | 622              | -146                                           | -330, 37      | 0.12           | 317                                         | -81, 716      |

|                                          |     |      |            |      |      |            |
|------------------------------------------|-----|------|------------|------|------|------------|
| Housekeeping Occupations                 | 623 | 50   | -112, 211  | 0.54 | -42  | -176, 93   |
| Sales Assistants And Retail Cashiers     | 711 | -2   | -55, 51    | 0.93 | 32   | -690, 752  |
| Sales Related Occupations                | 712 | 80   | -99, 256   | 0.37 | -78  | -250, 96   |
| Customer Service Occupations             | 721 | 71   | -37, 180   | 0.19 | -179 | -454, 94   |
| Process Operatives                       | 811 | 9    | -134, 155  | 0.91 | -15  | -262, 226  |
| Plant And Machine Operatives             | 812 | -145 | -517, 223  | 0.44 | 125  | -192, 446  |
| Assemblers And Routine Operatives        | 813 | -108 | -221, 1.7  | 0.06 | 370  | -5.9, 756  |
| Transport Drivers And Operatives         | 821 | 22   | -232, 271  | 0.86 | -14  | -176, 150  |
| Elementary Process Plant Occupations     | 913 | -62  | -206, 85   | 0.41 | 184  | -253, 615  |
| Elementary Goods Storage Occupations     | 914 | -311 | -668, 54   | 0.09 | 245  | -42, 528   |
| Elementary Administration Occupations    | 921 | 29   | -180, 236  | 0.78 | -38  | -302, 230  |
| Elementary Personal Services Occupations | 922 | -31  | -115, 52   | 0.48 | 182  | -308, 677  |
| Elementary Cleaning Occupations          | 923 | -74  | -144, -3.3 | 0.04 | 476  | 21, 924    |
| Elementary Security Occupations          | 924 | -39  | -219, 137  | 0.68 | 63   | -223, 355  |
| No occupation reported                   |     | -108 | -200, -16  | 0.02 | 893  | 135, 1646  |
| TOTAL                                    |     |      |            |      | 2273 | -165, 4688 |

\*Standard Occupational Classification (SOC) codes have been modified for disclosure control purposes. See Appendix Table 1 for details.

§ To assess differences between Scotland and England, Monte Carlo simulation was used to estimate the difference between the rate in Scotland and England. 95% CI and p values were calculated using this method as well. Simulated 95% CI are indicated using brackets.

Source: ONS Longitudinal Study and Scottish Longitudinal Study
